# Supplementary material for: Kinetic analysis of silver nanowire synthesis: polyol batch and continuous millifluidic methods
Source: Royal Society of Chemistry journal article supplement (doi:10.1039/d4nr03812f), 2025-01-01
Supplement: d4nr03812f1.pdf [file d4nr03812f1.pdf]

### Supplemental Information

A 2 m long section of 1.5 mm ID PTFE tubing was cut and coiled to maintain a bundle diameter of 6 inches (152 mm). This bundle was then submerged and suspended using wire in a well stirred, silicone oil bath heated to the reaction temperature of 158 °C. The volumetric flowrates were calculated based on the length and inner diameter of the PTFE tubing and the required residence time that was controlled by a syringe pump. It is assumed that the silicone oil bath is well-stirred, maintaining a constant, high  $Nu$  outside of the reaction tubing and due to laminar flow conditions, the  $Nu$  inside the reaction tubing is assumed to remain relatively constant but at a lower value. A reaction was conducted to analyze every fourth minute of residence time. Using residence times, calculated flowrates, and fluid properties, the  $Re$  and  $Nu$  were calculated at each residence time to show laminar conditions exist in the tubing and that  $Nu$  are relatively constant at a low value across the calculated flowrates. The calculated flow rates, dimensionless numbers, and the heat transfer coefficients are shown in **Table S1**.

**Table S1.** Flow Rates,  $Re$ ,  $Da$ ,  $Nu$ , and the Heat Transfer Coefficients Were Calculated for Each Residence Time.

| Residence Time (min) | Flowrate ( $\mu\text{l min}^{-1}$ ) | $Re$ | $Da$  | $De$ | $Nu$ | Heat Transfer Coefficient ( $\text{W m}^{-2} \text{K}^{-1}$ ) |
|----------------------|-------------------------------------|------|-------|------|------|---------------------------------------------------------------|
| 4                    | 900                                 | 8.5  | 0.004 | 0.85 | 4.61 | 866.6                                                         |
| 8                    | 450                                 | 4.2  | 0.008 | 0.42 | 4.33 | 813.8                                                         |
| 12                   | 300                                 | 2.8  | 0.013 | 0.28 | 4.21 | 790.6                                                         |
| 16                   | 225                                 | 2.1  | 0.018 | 0.21 | 4.13 | 776.8                                                         |
| 20                   | 180                                 | 1.7  | 0.022 | 0.17 | 4.08 | 767.4                                                         |
| 24                   | 150                                 | 1.4  | 0.027 | 0.14 | 4.04 | 760.4                                                         |
| 28                   | 129                                 | 1.2  | 0.030 | 0.12 | 4.02 | 755.1                                                         |
| 32                   | 112                                 | 1.1  | 0.035 | 0.10 | 4.00 | 750.5                                                         |
| 36                   | 100                                 | 0.9  | 0.040 | 0.09 | 3.97 | 747.0                                                         |
| 40                   | 90                                  | 0.8  | 0.044 | 0.08 | 3.96 | 744.0                                                         |

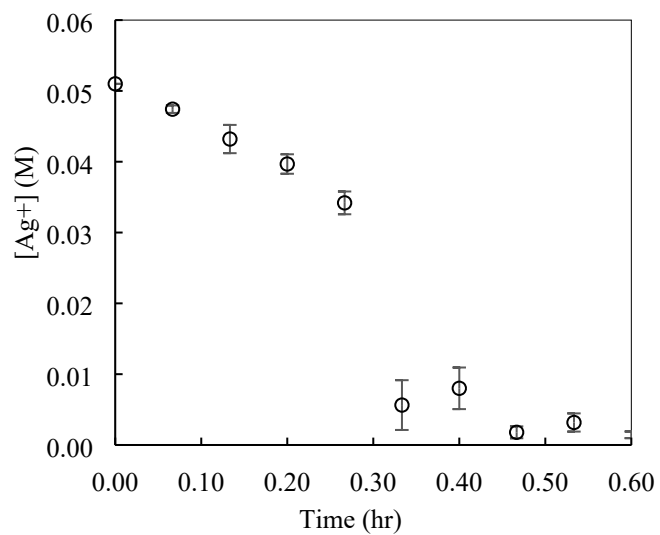

**Fig. S1.** The  $[Ag^+]$  over time using constant tubing lengths in a MFR.

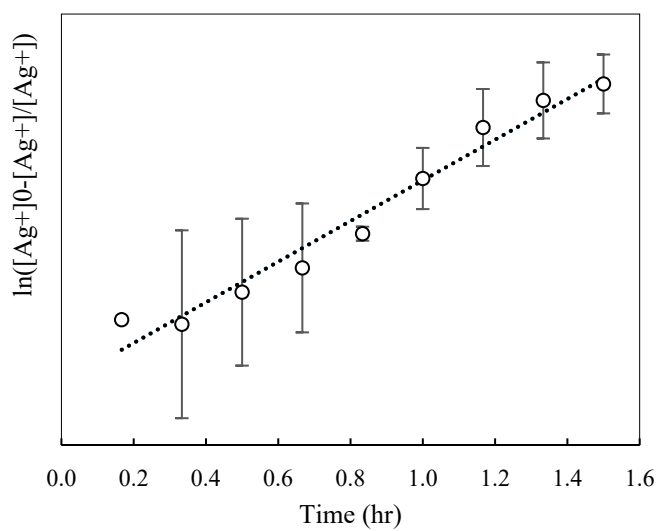

**Fig. S2.** The linearized form of the Finke-Watzky model applied to the batch data.

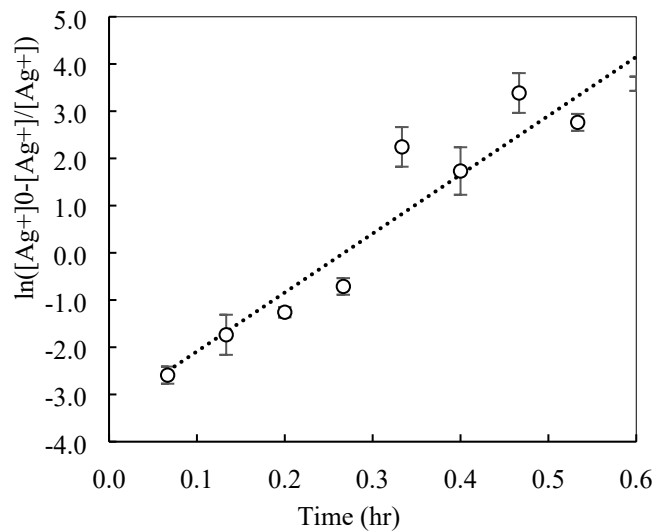

**Fig. S3.** The linearized form of the Finke-Watzky model applied to the MFR data for constant tubing lengths.

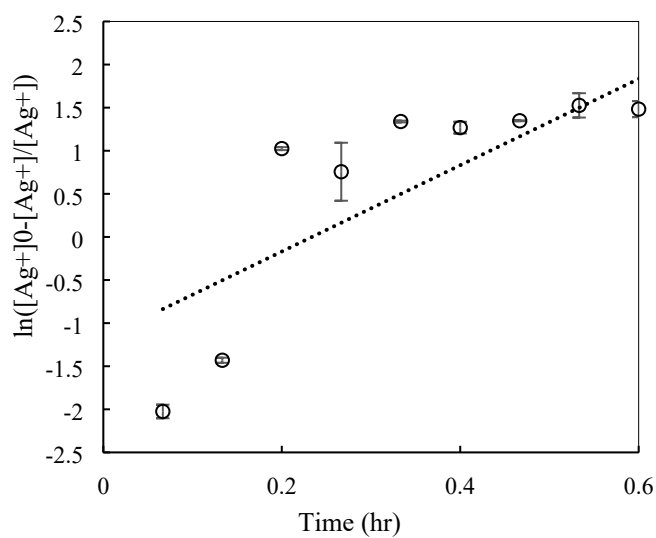

**Fig. S4.** The linearized form of the Finke-Watzky model applied to the MFR data for constant flowrates.

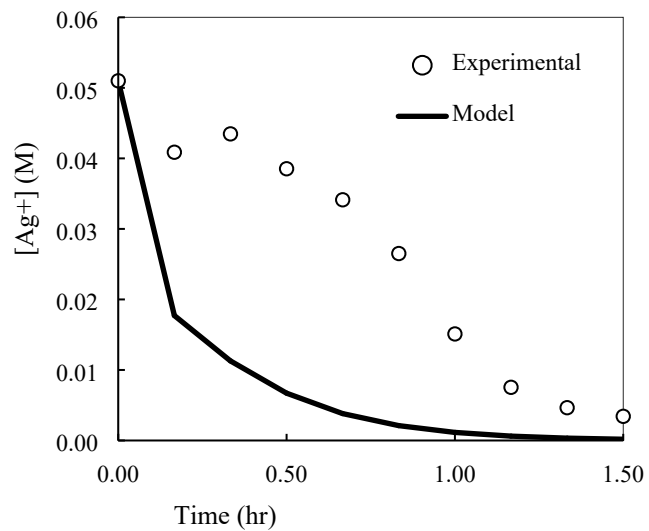

**Fig. S5.** Graph of the linearized batch model and data. The SSE for this model is  $4.4 \times 10^{-3}$ .

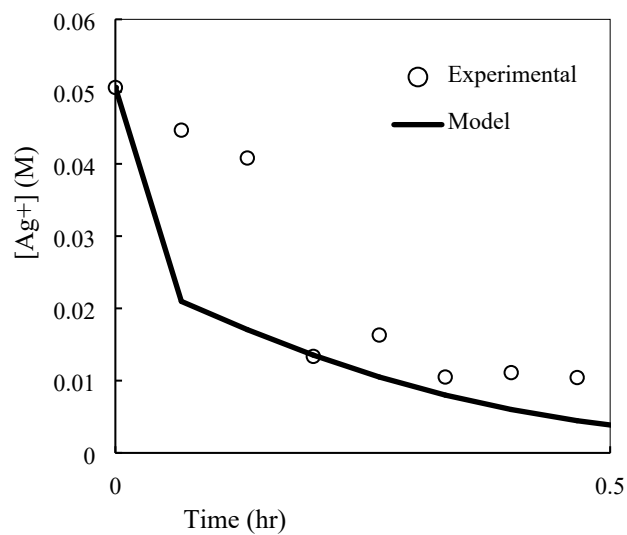

**Fig. S6.** Graph of the linearized MFR model and data for constant flowrates. The SSE for this Model is  $1.3 \times 10^{-3}$ .

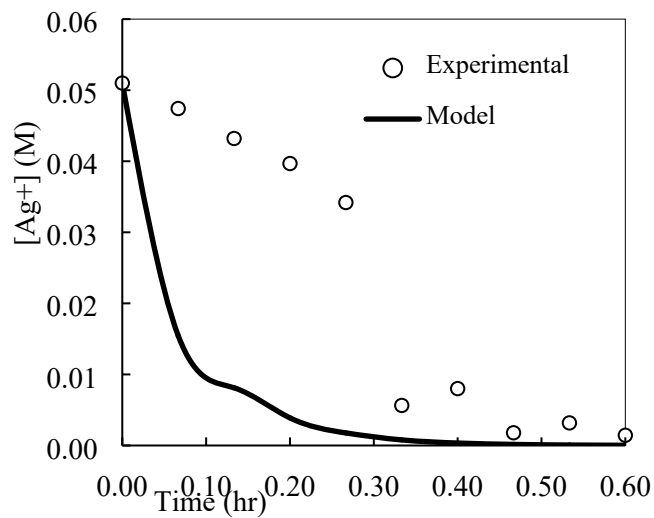

**Fig. S7.** Graph of the linearized MFR model and data for constant flowrates. The SSE for this Model is  $4.7 \times 10^{-3}$ .

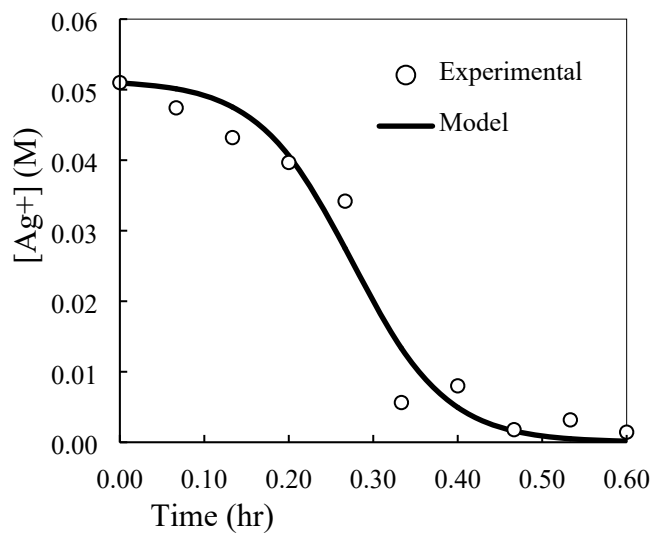

**Fig. S8.** Non-linear fit of  $[Ag^+]$  as a function of reaction time in the MFR for constant tubing lengths.

**Table S2.** Rate Constant values Compared between Batch and the Millifluidic Reactor using Two Different Method of varying Length and Flow Rate.

| Reactor                      | Linear Model          |                                    |                      | Non-Linear Model      |                                    |                      |
|------------------------------|-----------------------|------------------------------------|----------------------|-----------------------|------------------------------------|----------------------|
|                              | $k_1, \text{hr}^{-1}$ | $k_2, \text{hr}^{-1}\text{M}^{-1}$ | SSE                  | $k_1, \text{hr}^{-1}$ | $k_2, \text{hr}^{-1}\text{M}^{-1}$ | SSE                  |
| Batch                        | 0.011                 | 74.0                               | $4.4 \times 10^{-3}$ | 0.18                  | 71.9                               | $7.9 \times 10^{-5}$ |
| MFR (Constant Flow Rate)     | 0.079                 | 98.9                               | $1.3 \times 10^{-3}$ | 0.79                  | 158.3                              | $3.8 \times 10^{-4}$ |
| MFR (Constant Tubing Length) | 0.023                 | 244.7                              | $4.7 \times 10^{-3}$ | 0.12                  | 350.3                              | $1.5 \times 10^{-4}$ |
